# Supplementary material
Source: Research Square preprint supplement (doi:10.21203/rs.3.rs-8811044/v1)
Supplement: Supplementary file 1 [file 033c5b52f9defb93005268c4.docx]

**Supplementary Appendix Table 1. Diet Quality Before and After Nutritional Counseling According to Stage of Change and Type of Intervention (n = 220)**

|  | **Precontemplation or Contemplation**  **(n = 80)** | | | **Preparation**  **(n = 117)** | | | **Action or Maintenance**  **(n = 23)** | | | **Pa** | **Pb** |
| --- | --- | --- | --- | --- | --- | --- | --- | --- | --- | --- | --- |
| **Adequate Intake** | **n** | **Baseline** | **3-month** | **n** | **Baseline** | **3-month** | **n** | **Baseline** | **3-month** |  |  |
| **Fish** |  |  |  |  |  |  |  |  |  |  | 0.372 |
| **Intervention** | 43 | **2 (4.7%)** | **11 (25.6%)*** | 47 | 6 (13%) | 11 (23%) | 8 | 1 (12%) | 4 (50%) | 0.339 |  |
| **Control** | 25 | 3 (12%) | 4 (16%) | 53 | 10 (19%) | 10 (19%) | 14 | 4 (29%) | 2 (14%) | 0.620 |  |
| **Nuts** |  |  |  |  |  |  |  |  |  |  | 0.600 |
| **Intervention** | 43 | **4 (9%)** | **10 (23%)*** | 47 | 6 (13%) | 12 (25%) | 8 | 12 (12%) | 27 (28%) | 0.927 |  |
| **Control** | 25 | 3 (12%) | 5 (20%) | 53 | **6 (11%)** | **21 (40%)**** | 14 | **3 (21%)** | **7 (50%)*** | 0.571 |  |
| **Fruits** |  |  |  |  |  |  |  |  |  |  | 0.155 |
| **Intervention** | 43 | **8 (19%)** | **19 (44%)**** | 47 | **9 (19%)** | **17 (36%)*** | 8 | **3 (37%)** | **7 (87%)**** | 0.911 |  |
| **Control** | 25 | 8 (32%) | 5 (20%) | 53 | 15 (28%) | 21 (40%) | 14 | **9 (64%)** | **5 (56%)*** | **0.016** |  |
| **Vegetables** |  |  |  |  |  |  |  |  |  |  | 0.376 |
| **Intervention** | 43 | 12 (28%) | 17 (40%) | 47 | 10 (21%) | 16 (34%) | 8 | 3 (37%) | 4 (50%) | 0.793 |  |
| **Control** | 25 | 5 (20%) | 4 (16%) | 53 | 13 (24%) | 16 (30%) | 14 | 3 (21%) | 7 (50%) | 0.359 |  |
| **Ultra-processed Foods** |  |  |  |  |  |  |  |  |  |  | 0.873 |
| **Intervention** | 43 | **7 (16%)** | **19 (44%)**** | 47 | **12 (25%)** | **23 (49%)**** | 8 | **2 (25%)** | **7 (87%)**** | 0.781 |  |
| **Control** | 25 | 8 (32%) | 8 (32%) | 53 | 20 (38%) | 23 (43%) | 14 | 6 (43%) | 9 (64%) | 0.712 |  |
| **Dairy** |  |  |  |  |  |  |  |  |  |  | 0.570 |
| **Intervention** | 43 | 10 (23%) | 13 (30%) | 47 | **12 (25%)** | **21 (45%)*** | 8 | **2 (25%)** | **5 (62%)*** | 0.459 |  |
| **Control** | 25 | 10 (40%) | 8 (32%) | 53 | 18 (43%) | 15 (28%) | 14 | 10 (71%) | 8 (57%) | 0.994 |  |
| **Processed meats** |  |  |  |  |  |  |  |  |  |  | 0.793 |
| **Intervention** | 43 | **15 (35%)** | **26 (60%)**** | 47 | **9 (19%)** | **24 (51%)**** | 8 | **3 (37.5%)** | **8 (100%)**** | 0.781 |  |
| **Control** | 25 | 11 (44%) | 12 (48%) | 53 | **23 (43%)** | **33 (62%)**** | 14 | 7 (50%) | 8 (57%) | 0.712 |  |
| **Beans** |  |  |  |  |  |  |  |  |  |  | 0.076 |
| **Intervention** | 43 | 20 (46%) | 27 (63%) | 47 | **19 (40%)** | **29 (62%)*** | 8 | **2 (25%)** | **7 (87.5%)**** | 0.319 |  |
| **Control** | 25 | 13 (52%) | 18 (72%) | 53 | 30 (57%) | 28 (53%) | 14 | 11 (79%) | 10 (71%) | 0.134 |  |
| **Whole Grains** |  |  |  |  |  |  |  |  |  |  | 0.766 |
| **Intervention** | 43 | 2 (5%) | 5 (12%) | 47 | 3 (6%) | 9 (19%) | 8 | **1 (12%)** | **4 (50%)*** | 0.904 |  |
| **Control** | 25 | 2 (8%) | 4 (16%) | 53 | 3 (6%) | 5 (9%) | 14 | 1 (7%) | 2 (14.3%) | 0.609 |  |
| **Sugar-sweetened Beverages** |  |  |  |  |  |  |  |  |  |  | 0.792 |
| **Intervention** | 43 | **19 (44%)** | **29 (67%)**** | 47 | **17 (36%)** | **29 (62%)**** | 8 | **4 (50%)** | **7 (87.5%)*** | 0.837 |  |
| **Control** | 25 | 16 (64%) | 13 (52%) | 53 | 25 (47%) | 29 (55%) | 14 | 9 (64%) | 10 (71%) | 0.361 |  |
| **Red Meat** |  |  |  |  |  |  |  |  |  |  | 0.521 |
| **Intervention** | 43 | 7 (16%) | 13 (30%) | 47 | 11 (23%) | 11 (23%) | 8 | 2 (25%) | 4 (50%) | 0.491 |  |
| **Control** | 25 | 8 (32%) | 7 (28%) | 53 | 16 (30%) | 15 (28%) | 14 | 4 (29%) | 6 (43%) | 0.570 |  |

The data represent the number of cases for the total group, expressed as percentages. Adequate intake refers to participants who rated their intake as 'excellent' or 'very good' according to the Wheel of Cardiovascular Health Diet [19].*P<0.05; **P<0.01. Interaction P-values: astages and time; bstages, time, and group, determined by Generalized Estimating Equations regression adjusted for sex.
